# Supplementary material for: Monolithic Perovskite-Carrier Selective Contact Silicon Tandem Solar Cells Using Molybdenum Oxide as a Hole Selective Layer
Source: MDPI journal article supplement (doi:10.3390/en14113108), 2021-05-26
Supplement: s1 [file s1]

Supplementary Material

# Monolithic perovskite-carrier selective contact silicon tandem solar cells using molybdenum oxide as a hole selective layer

Hoyoung Song<sup>1</sup>, Changhyun Lee<sup>1</sup>, Jiyeon Hyun<sup>1</sup>, Sang-Won Lee<sup>1</sup>, Dongjin Choi<sup>1</sup>, Dowon Pyun<sup>1</sup>, Jiyeon Nam<sup>1</sup>, Seok-Hyun Jeong<sup>1</sup>, Jiryang Kim<sup>2</sup>, Soohyun Bae<sup>3</sup>, Hyunju Lee<sup>4</sup>, Yoonmook Kang<sup>2</sup>, Donghwan Kim<sup>1\*</sup> and Hae-Seok Lee<sup>2\*</sup>

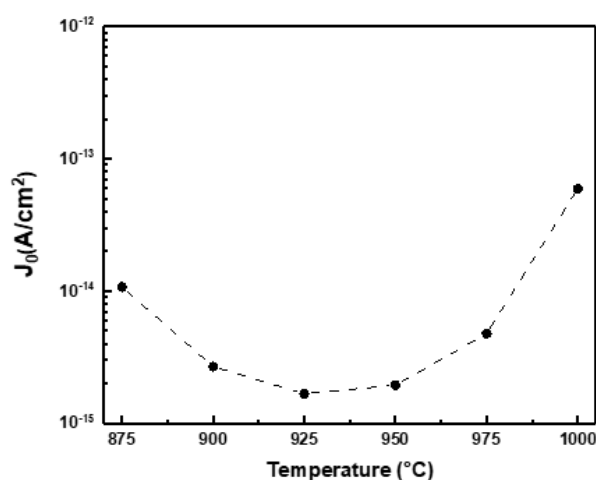

**Figure S1.** Recombination current density of  $n^+$  poly Si/tunnel oxide/Si symmetric structures according to annealing temperature

| Year | Institute              | $V_{oc}$<br>[mV] | $J_{sc}$<br>[mA/cm <sup>2</sup> ] | FF<br>[%] | Eff.<br>[%] | Hole selective contact structure                 | Remark                                                 |
|------|------------------------|------------------|-----------------------------------|-----------|-------------|--------------------------------------------------|--------------------------------------------------------|
| 2014 | Berkeley <sup>25</sup> | 580              | 37.8                              | 65        | 14.3        | MoO <sub>x</sub> / c-Si(n)                       | No interlayer, textured surface                        |
| 2014 | Berkeley <sup>27</sup> | 711              | 39.4                              | 67.2      | 18.8        | MoO <sub>x</sub> / a-Si:H (i) / c-Si(n)          | Textured surface                                       |
| 2015 | ANU <sup>26</sup>      | 637              | 35                                | 75        | 16.7        | MoO <sub>x</sub> / SiO <sub>x</sub> / c-Si(n)    | Planar surface                                         |
| 2015 | ANU <sup>43</sup>      | 658              | 39.8                              | 77.8      | 20.4        | c-Si(p) / MoO <sub>x</sub>                       | Textured surface, no interlayer, partial rear contacts |
| 2015 | EPFL <sup>28</sup>     | 725              | 38.6                              | 80.4      | 22.5        | MoO <sub>x</sub> / a-Si:H (i) / c-Si(n)          | Textured surface                                       |
| 2016 | Berkeley <sup>29</sup> | 706              | 38.4                              | 76.2      | 20.7        | MoO <sub>x</sub> / a-Si:H (i) / c-Si(n)          | Textured surface                                       |
| 2019 | UCAS <sup>44</sup>     | 631              | 36                                | 80.8      | 18.4        | c-Si(p) / MoO <sub>x</sub>                       | Textured surface, no interlayer, back surface field    |
| 2020 | UCAS <sup>45</sup>     | 635              | 38.1                              | 79.1      | 19.1        | c-Si(p) / UV-SiO <sub>x</sub> / MoO <sub>x</sub> | Textured surface, back surface field                   |
| 2020 | EPFL <sup>46</sup>     | 733              | 38.9                              | 81.7      | 23.5        | MoO <sub>x</sub> / a-Si:H (i) / c-Si(n)          | Textured surface                                       |

**Table S1.** Efficiency table of MoO<sub>x</sub> hole selective contact silicon solar cells

| Type of solar cell                    | $V_{oc}$<br>[V] | $J_{sc}$<br>[mA/cm <sup>2</sup> ] | FF<br>[%] | PCE<br>[%] |
|---------------------------------------|-----------------|-----------------------------------|-----------|------------|
| #1-1 MoO <sub>x</sub> -ITO 80 nm      | 1.485           | 9.77                              | 55.05     | 8.0        |
| #1-2 MoO <sub>x</sub> -ITO 20 nm      | 1.501           | 9.54                              | 54.15     | 7.8        |
| #2 MoO <sub>x</sub> -SnO <sub>2</sub> | 0.996           | 9.60                              | 34.04     | 3.3        |

**Table S2.** Photovoltaic parameters of the monolithic perovskite-carrier selective contact silicon tandem solar cells

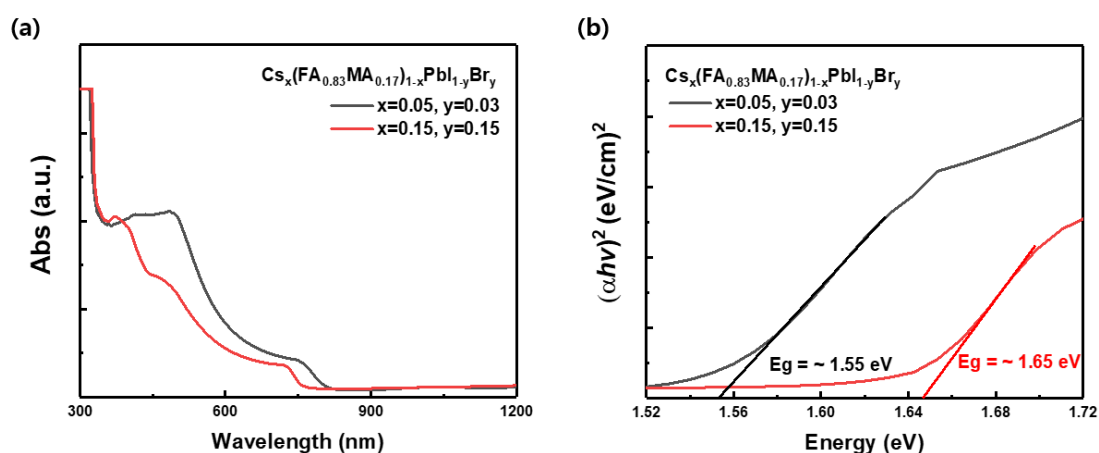

**Figure S2.** (a) UV-vis absorption spectra and (b) Tauc plot of the perovskite layer according to the composition

## References

1. Battaglia, C.; Yin, X.; Zheng, M.; Sharp, I. D.; Chen, T.; McDonnell, S.; Azcatl, A.; Carraro, C.; Ma, B.; Maboudian, R.; Wallace, R. M.; Javey, A., Hole Selective MoO<sub>x</sub> Contact for Silicon Solar Cells. *Nano Letters* **2014**, *14* (2), 967-971. [<https://doi.org/10.1021/nl404389u>]
2. Battaglia, C.; de Nicolás, S. M.; De Wolf, S.; Yin, X.; Zheng, M.; Ballif, C.; Javey, A., Silicon heterojunction solar cell with passivated hole selective MoO<sub>x</sub> contact. *Applied Physics Letters* **2014**, *104* (11), 113902. [<https://doi.org/10.1063/1.4868880>]
3. Bullock, J.; Yan, D.; Cuevas, A.; Wan, Y.; Samundsett, C., n- and p-typesilicon Solar Cells with Molybdenum Oxide Hole Contacts. *Energy Procedia* **2015**, *77*, 446-450. [<https://doi.org/10.1016/j.egypro.2015.07.063>]
4. Bullock, J.; Samundsett, C.; Cuevas, A.; Yan, D.; Wan, Y.; Allen, T., Proof-of-Concept p-Type Silicon Solar Cells With Molybdenum Oxide Local Rear Contacts. *IEEE Journal of Photovoltaics* **2015**, *5* (6), 1591-1594. [<https://doi.org/10.1109/JPHOTOV.2015.2478026>]
5. Geissbühler, J.; Werner, J.; Martin de Nicolas, S.; Barraud, L.; Hessler-Wyser, A.; Despeisse, M.; Nicolay, S.; Tomasi, A.; Niesen, B.; De Wolf, S.; Ballif, C., 22.5%

efficient silicon heterojunction solar cell with molybdenum oxide hole collector. *Applied Physics Letters* **2015**, *107* (8), 081601. [<https://doi.org/10.1063/1.4928747>]

6. Bullock, J.; Hettick, M.; Geissbühler, J.; Ong, A. J.; Allen, T.; Sutter-Fella, Carolin M.; Chen, T.; Ota, H.; Schaler, E. W.; De Wolf, S.; Ballif, C.; Cuevas, A.; Javey, A., Efficient silicon solar cells with dopant-free asymmetric heterocontacts. *Nature Energy* **2016**, *1* (3), 15031. [<https://doi.org/10.1038/nenergy.2015.31>]

7. Cao, S.; Li, J.; Lin, Y.; Pan, T.; Du, G.; Zhang, J.; Yang, L.; Chen, X.; Lu, L.; Min, N.; Yin, M.; Li, D., Interfacial Behavior and Stability Analysis of p-Type Crystalline Silicon Solar Cells Based on Hole-Selective MoOX/Metal Contacts. *Solar RRL* **2019**, *3* (11), 1900274. [<https://doi.org/10.1002/solr.201900274>]

8. Cao, S.; Li, J.; Zhang, J.; Lin, Y.; Lu, L.; Wang, J.; Yin, M.; Yang, L.; Chen, X.; Li, D., Stable MoOX-Based Heterocontacts for p-Type Crystalline Silicon Solar Cells Achieving 20% Efficiency. *Advanced Functional Materials* **2020**, *30* (49), 2004367. [<https://doi.org/10.1002/adfm.202004367>]

9. Dréon, J.; Jeangros, Q.; Cattin, J.; Haschke, J.; Antognini, L.; Ballif, C.; Boccard, M., 23.5%-efficient silicon heterojunction silicon solar cell using molybdenum oxide as hole-selective contact. *Nano Energy* **2020**, *70*, 104495. [<https://doi.org/10.1016/j.nanoen.2020.104495>]
